# Supplementary material
Source: PubMed Central journal article supplement (PMC4153397)
Supplement: NIHMS587141-supplement-Supp_TableS1-S2___FigureS1-S7.pdf [file NIHMS587141-supplement-Supp_TableS1-S2___FigureS1-S7.pdf]

| Table S1. Fluorophores used in this study. |                        |             |          |                       |
|--------------------------------------------|------------------------|-------------|----------|-----------------------|
| Fluorophore                                | Company                | Code        | Dilution | Working Concentration |
| Streptavidin Alexa Fluor® 647 conjugate    | Invitrogen             | S21374      | 1:333    | 3 µg/mL               |
| Streptavidin Alexa Fluor® 546 conjugate    | Invitrogen             | S11225      | 1:333    | 3 µg/mL               |
| Streptavidin cy3 conjugate                 | Jackson ImmunoResearch | 016-160-084 | 1:500    | 1 µg/mL               |

| Table S2. Proportion of ID4 <sup>+</sup> cells that co-stain for other markers. |               |           |
|---------------------------------------------------------------------------------|---------------|-----------|
| Marker                                                                          | % (mean±S.D.) | Range (%) |
| PLZF                                                                            | 96.0±1.8      | 94.1-97.6 |
| UTF1                                                                            | 37.1±15.1     | 24.8-54.0 |
| KIT                                                                             | 13.3±4.1      | 8.6-16.3  |
| Ki67                                                                            | 1.6±1.1       | 0.6-2.8   |

# Figure S1

(-) control for mouse primary antibodies

(-) control for rabbit primary antibodies

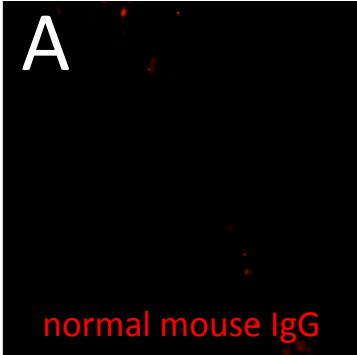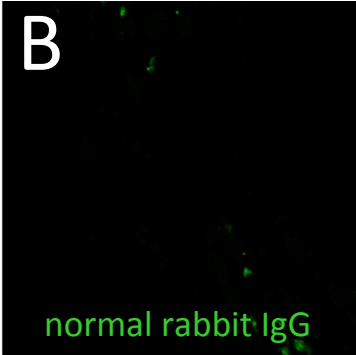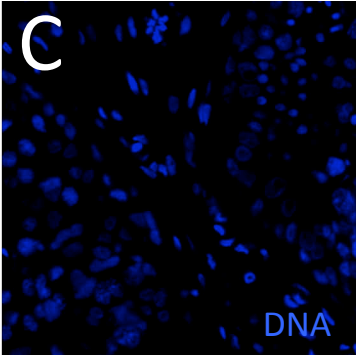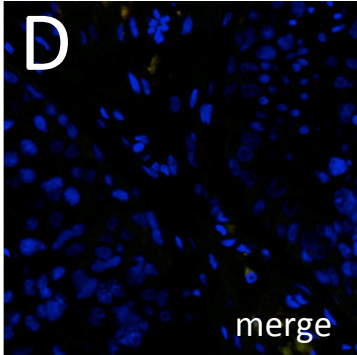

(-) control for goat primary antibodies with BT amplification

(-) control for rabbit primary antibodies

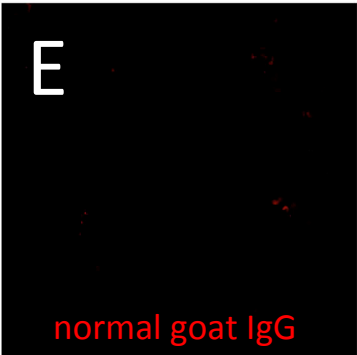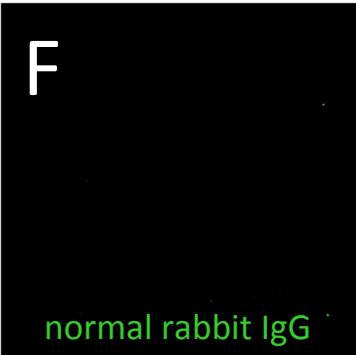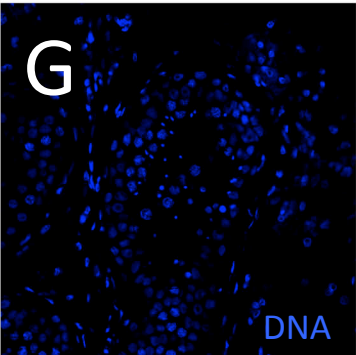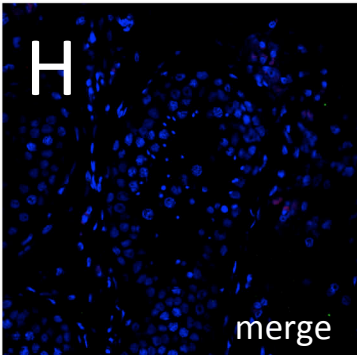

(-) control for mouse primary antibodies with BT amplification

(-) control for rabbit primary antibodies

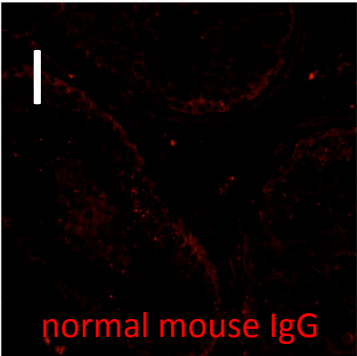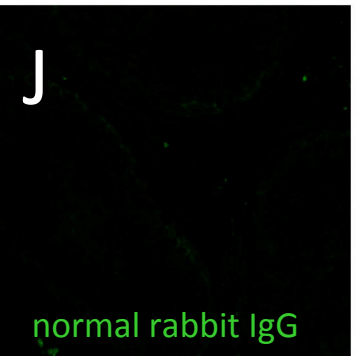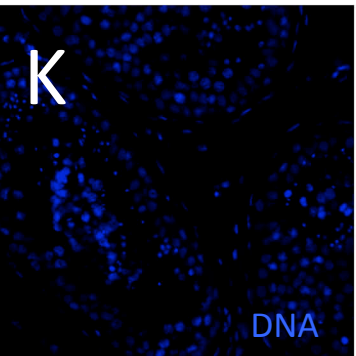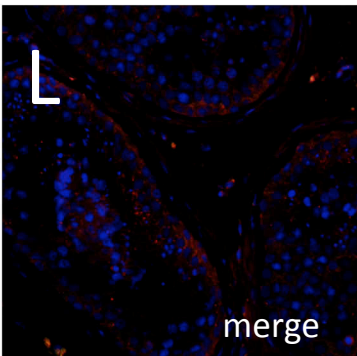

Figure S1. Negative controls for standard and highly amplified IF assays.

# Figure S2

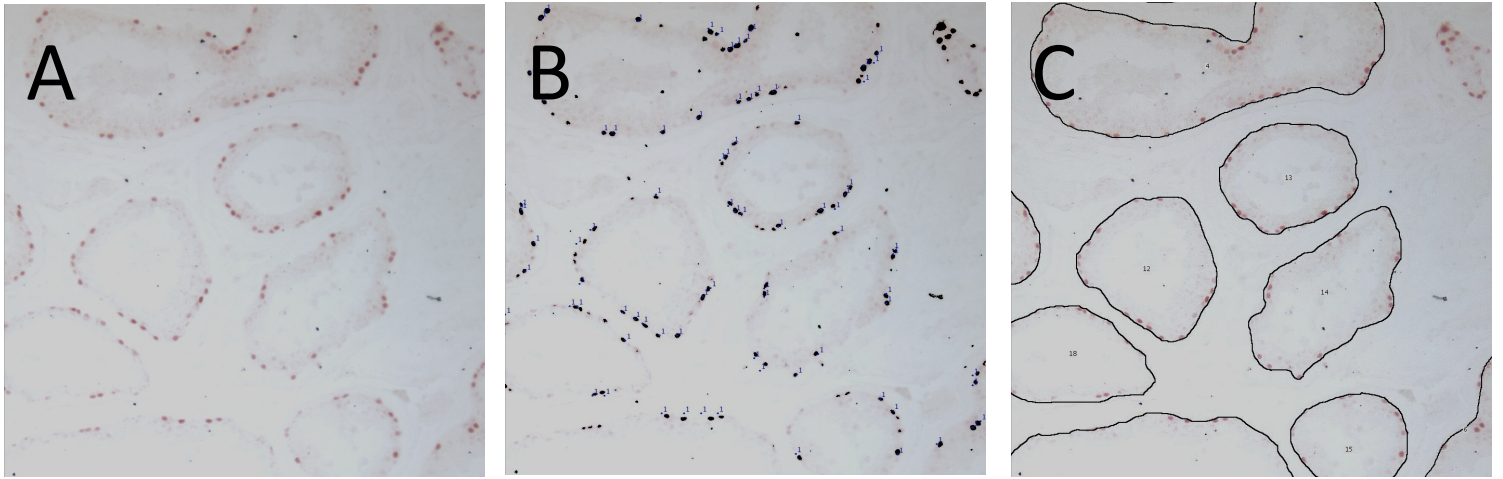

Figure S2. Example of image-based cell quantitation procedure for ID4 IHC staining.

# Figure S3

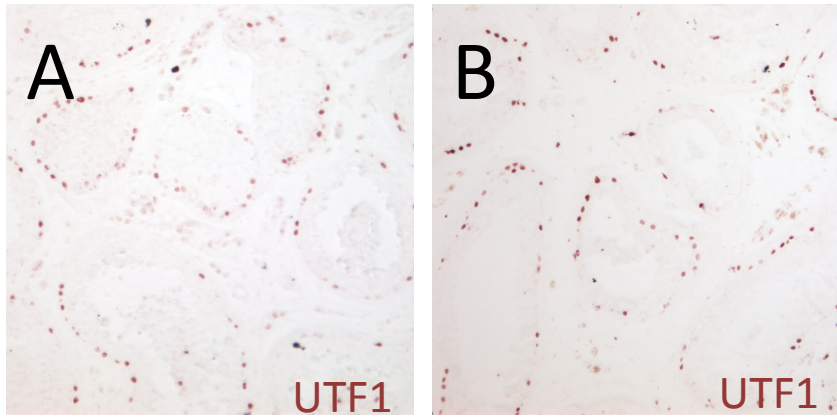

Figure S3. Representative UTF1 IHC in adult testis for young and older donors.

# Figure S4

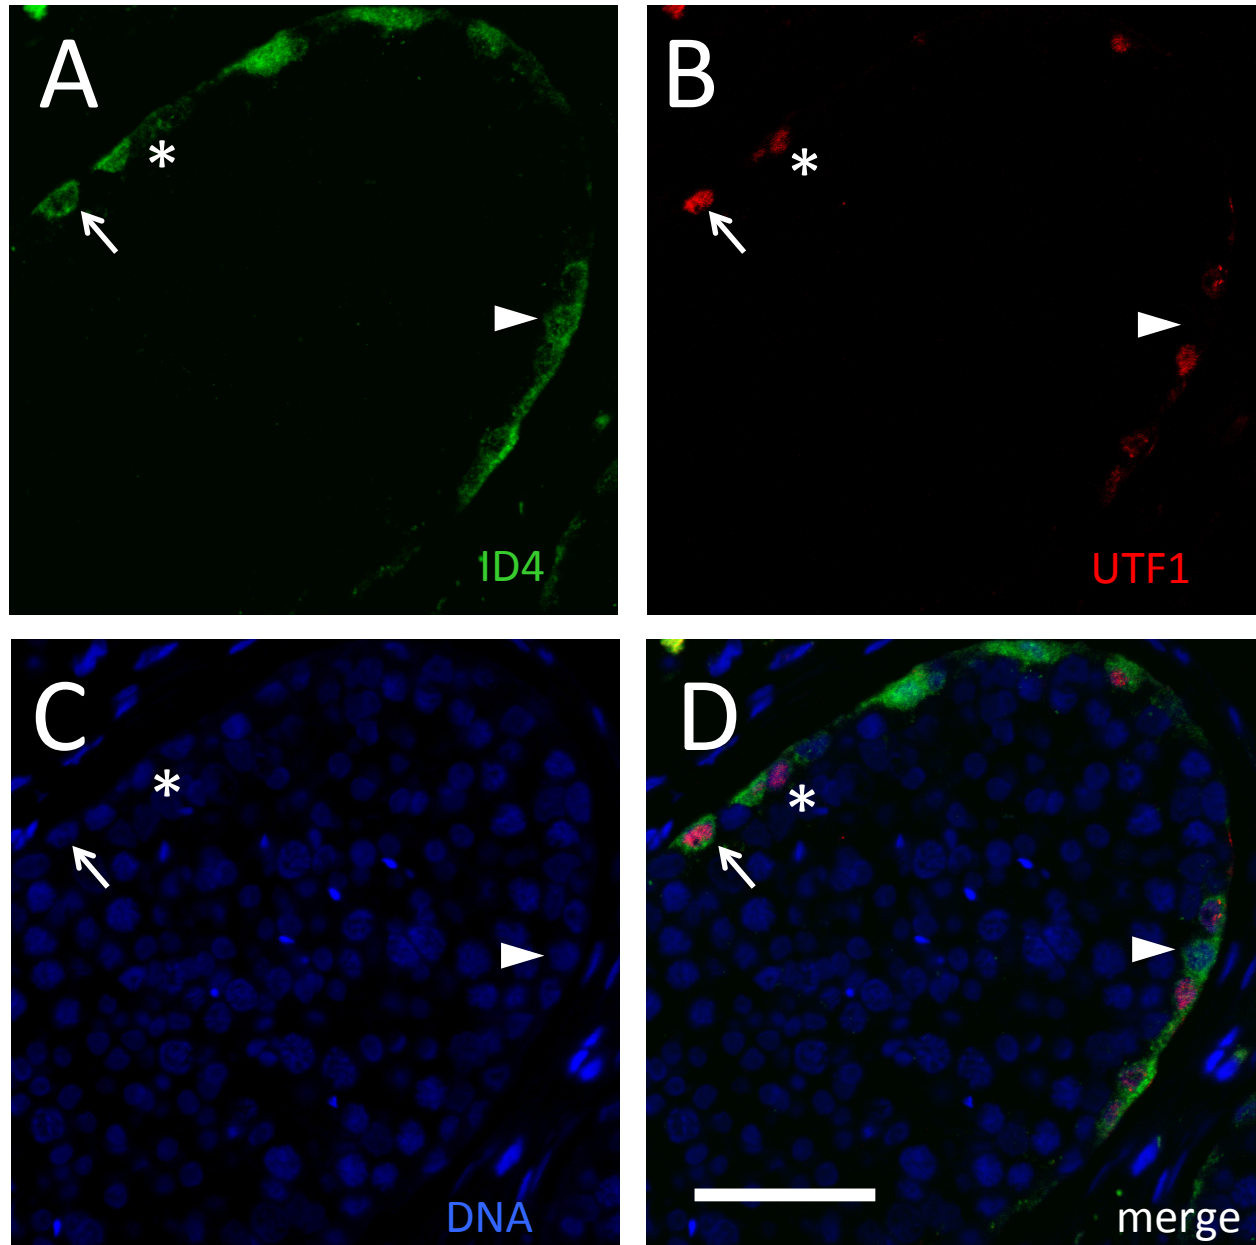

Figure S4. Co-localization of anti-ID4 and anti-UTF1 signals in the human seminiferous epithelium (additional field).

# Figure S5

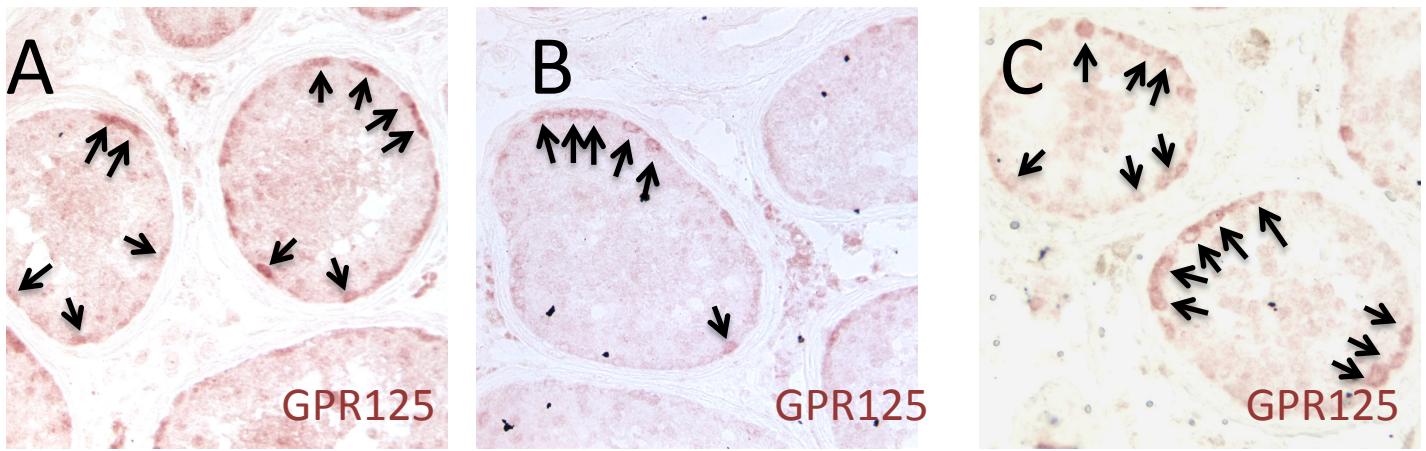

Figure S5. Representative GPR125 IHC in adult testis for young and older donors.



# Figure S6

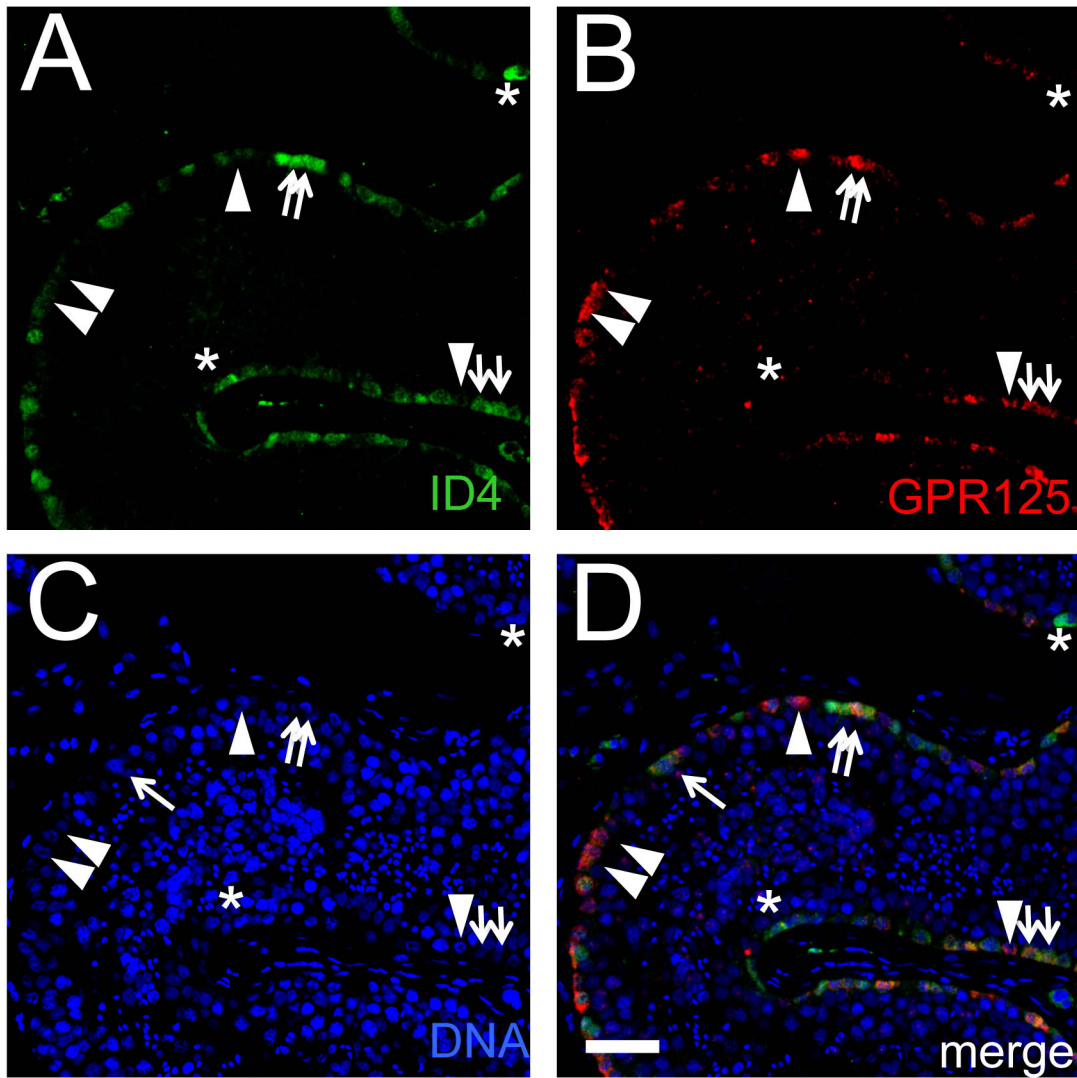

Figure S6. Partial overlap of anti-ID4 and anti-GPR125 signal in the human seminiferous epithelium.



Figure S7

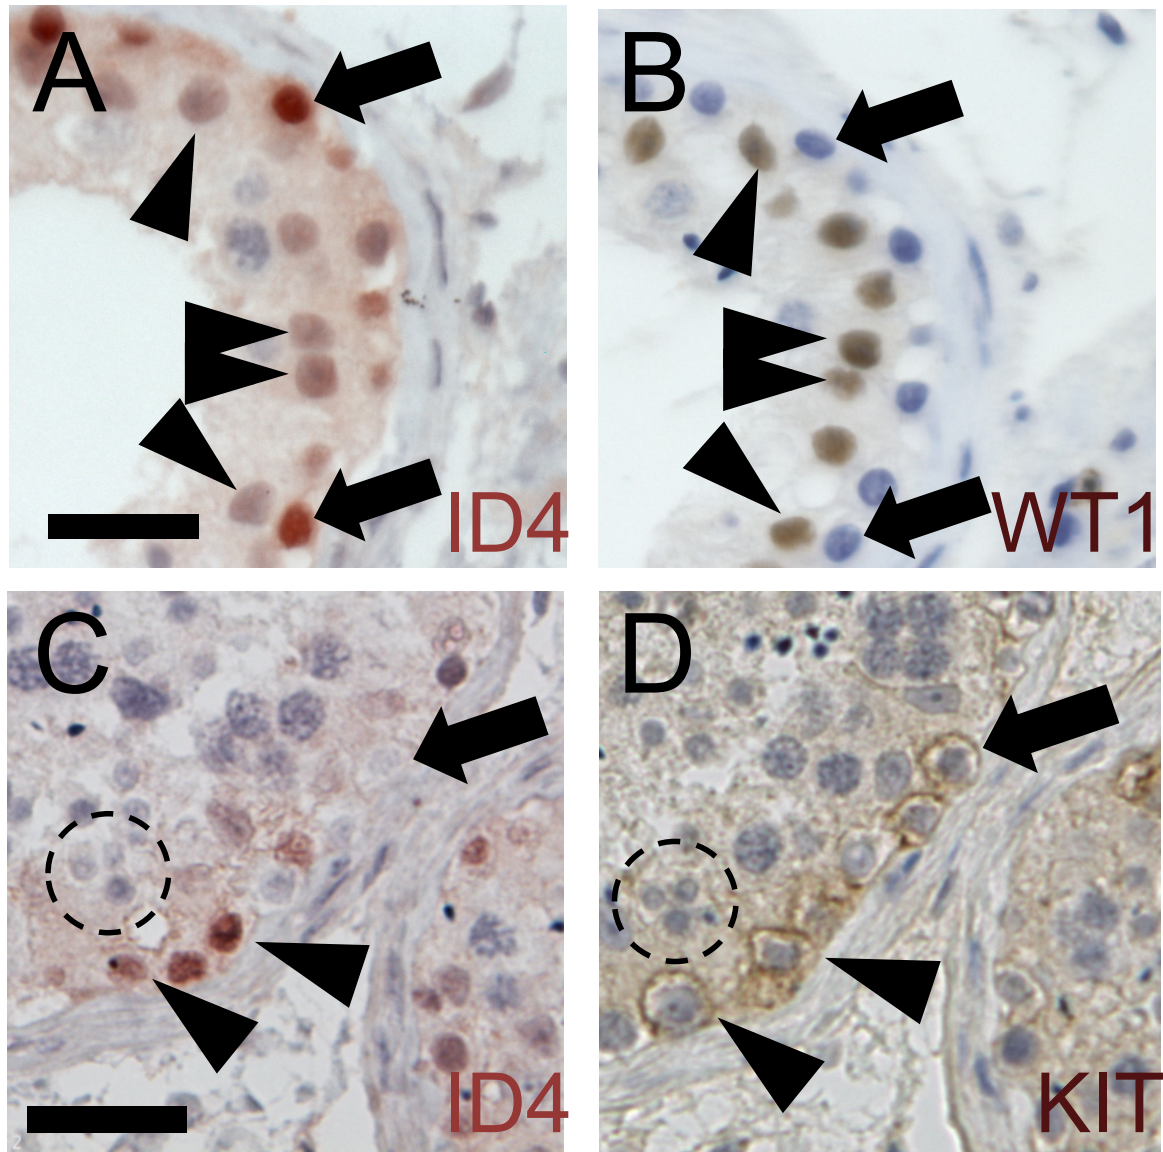

Figure S7. Co-localization of anti-ID4 and either anti-KIT or anti-WT1 immunoreactive cells in the human seminiferous epithelium
